# Supplementary material for: Reconstitution of T Cell Proliferation under Arginine Limitation: Activated Human T Cells Take Up Citrulline via L-Type Amino Acid Transporter 1 and Use It to Regenerate Arginine after Induction of Argininosuccinate Synthase Expression
Source: PubMed Central journal article supplement (PMC5523021; doi:10.3389/fimmu.2017.00864), 2017-07-24
Supplement: Data_Sheet_1.pdf [file Data_Sheet_1.pdf]

### Supplementary Table 1:

The table lists all p-values between experimental groups obtained in the statistical analyses specified in the respective figure legend.

Figure 1

C

| experimental groups compared                     | p-value  |
|--------------------------------------------------|----------|
| 1000 $\mu$ M Arg + Cit vs. 100 $\mu$ M Arg + Cit | 0,0017   |
| 1000 $\mu$ M Arg + Cit vs. 20 $\mu$ M Arg + Cit  | < 0,0001 |
| 1000 $\mu$ M Arg + Cit vs. 5 $\mu$ M Arg + Cit   | < 0,0001 |
| 1000 $\mu$ M Arg + Cit vs. 0 $\mu$ M Arg + Cit   | < 0,0001 |
| 1000 $\mu$ M Arg + Cit vs. 1000 $\mu$ M Arg      | 0,3512   |
| 1000 $\mu$ M Arg + Cit vs. 100 $\mu$ M Arg       | < 0,0001 |
| 1000 $\mu$ M Arg + Cit vs. 20 $\mu$ M Arg        | < 0,0001 |
| 1000 $\mu$ M Arg + Cit vs. 5 $\mu$ M Arg         | < 0,0001 |
| 1000 $\mu$ M Arg + Cit vs. 0 $\mu$ M Arg         | < 0,0001 |
| 100 $\mu$ M Arg + Cit vs. 20 $\mu$ M Arg + Cit   | < 0,0001 |
| 100 $\mu$ M Arg + Cit vs. 5 $\mu$ M Arg + Cit    | < 0,0001 |
| 100 $\mu$ M Arg + Cit vs. 0 $\mu$ M Arg + Cit    | < 0,0001 |
| 100 $\mu$ M Arg + Cit vs. 1000 $\mu$ M Arg       | 0,9142   |
| 100 $\mu$ M Arg + Cit vs. 100 $\mu$ M Arg        | 0,0065   |
| 100 $\mu$ M Arg + Cit vs. 20 $\mu$ M Arg         | < 0,0001 |
| 100 $\mu$ M Arg + Cit vs. 5 $\mu$ M Arg          | < 0,0001 |
| 100 $\mu$ M Arg + Cit vs. 0 $\mu$ M Arg          | < 0,0001 |
| 20 $\mu$ M Arg + Cit vs. 5 $\mu$ M Arg + Cit     | < 0,0001 |
| 20 $\mu$ M Arg + Cit vs. 0 $\mu$ M Arg + Cit     | < 0,0001 |
| 20 $\mu$ M Arg + Cit vs. 1000 $\mu$ M Arg        | < 0,0001 |
| 20 $\mu$ M Arg + Cit vs. 100 $\mu$ M Arg         | 0,2206   |
| 20 $\mu$ M Arg + Cit vs. 20 $\mu$ M Arg          | < 0,0001 |
| 20 $\mu$ M Arg + Cit vs. 5 $\mu$ M Arg           | < 0,0001 |
| 20 $\mu$ M Arg + Cit vs. 0 $\mu$ M Arg           | < 0,0001 |
| 5 $\mu$ M Arg + Cit vs. 0 $\mu$ M Arg + Cit      | 0,7785   |
| 5 $\mu$ M Arg + Cit vs. 1000 $\mu$ M Arg         | < 0,0001 |
| 5 $\mu$ M Arg + Cit vs. 100 $\mu$ M Arg          | < 0,0001 |
| 5 $\mu$ M Arg + Cit vs. 20 $\mu$ M Arg           | > 0,9999 |
| 5 $\mu$ M Arg + Cit vs. 5 $\mu$ M Arg            | 0,8368   |
| 5 $\mu$ M Arg + Cit vs. 0 $\mu$ M Arg            | 0,6058   |
| 0 $\mu$ M Arg + Cit vs. 1000 $\mu$ M Arg         | < 0,0001 |
| 0 $\mu$ M Arg + Cit vs. 100 $\mu$ M Arg          | < 0,0001 |
| 0 $\mu$ M Arg + Cit vs. 20 $\mu$ M Arg           | 0,4747   |
| 0 $\mu$ M Arg + Cit vs. 5 $\mu$ M Arg            | > 0,9999 |
| 0 $\mu$ M Arg + Cit vs. 0 $\mu$ M Arg            | > 0,9999 |
| 1000 $\mu$ M Arg vs. 100 $\mu$ M Arg             | 0,0003   |
| 1000 $\mu$ M Arg vs. 20 $\mu$ M Arg              | < 0,0001 |
| 1000 $\mu$ M Arg vs. 5 $\mu$ M Arg               | < 0,0001 |
| 1000 $\mu$ M Arg vs. 0 $\mu$ M Arg               | < 0,0001 |

|                                    |          |
|------------------------------------|----------|
| 100 $\mu$ M Arg vs. 20 $\mu$ M Arg | < 0,0001 |
| 100 $\mu$ M Arg vs. 5 $\mu$ M Arg  | < 0,0001 |
| 100 $\mu$ M Arg vs. 0 $\mu$ M Arg  | < 0,0001 |
| 20 $\mu$ M Arg vs. 5 $\mu$ M Arg   | 0,5499   |
| 20 $\mu$ M Arg vs. 0 $\mu$ M Arg   | 0,3061   |
| 5 $\mu$ M Arg vs. 0 $\mu$ M Arg    | > 0,9999 |

D

| <b>experimental groups compared</b>         | <b>p-value</b> |
|---------------------------------------------|----------------|
| 1000 $\mu$ M Arg vs. 100 $\mu$ M Arg        | 0,0060         |
| 1000 $\mu$ M Arg vs. 20 $\mu$ M Arg         | < 0,0001       |
| 1000 $\mu$ M Arg vs. 5 $\mu$ M Arg          | < 0,0001       |
| 1000 $\mu$ M Arg vs. 0 $\mu$ M Arg          | < 0,0001       |
| 1000 $\mu$ M Arg vs. 1000 $\mu$ M Arg + Cit | 0,1222         |
| 1000 $\mu$ M Arg vs. 100 $\mu$ M Arg + Cit  | < 0,0001       |
| 1000 $\mu$ M Arg vs. 20 $\mu$ M Arg + Cit   | < 0,0001       |
| 1000 $\mu$ M Arg vs. 5 $\mu$ M Arg + Cit    | < 0,0001       |
| 1000 $\mu$ M Arg vs. 0 $\mu$ M Arg + Cit    | < 0,0001       |
| 100 $\mu$ M Arg vs. 20 $\mu$ M Arg          | 0,0013         |
| 100 $\mu$ M Arg vs. 5 $\mu$ M Arg           | < 0,0001       |
| 100 $\mu$ M Arg vs. 0 $\mu$ M Arg           | < 0,0001       |
| 100 $\mu$ M Arg vs. 1000 $\mu$ M Arg + Cit  | > 0,9999       |
| 100 $\mu$ M Arg vs. 100 $\mu$ M Arg + Cit   | 0,7467         |
| 100 $\mu$ M Arg vs. 20 $\mu$ M Arg + Cit    | 0,0054         |
| 100 $\mu$ M Arg vs. 5 $\mu$ M Arg + Cit     | 0,0001         |
| 100 $\mu$ M Arg vs. 0 $\mu$ M Arg + Cit     | < 0,0001       |
| 20 $\mu$ M Arg vs. 5 $\mu$ M Arg            | 0,1931         |
| 20 $\mu$ M Arg vs. 0 $\mu$ M Arg            | < 0,0001       |
| 20 $\mu$ M Arg vs. 1000 $\mu$ M Arg + Cit   | 0,0116         |
| 20 $\mu$ M Arg vs. 100 $\mu$ M Arg + Cit    | 0,2710         |
| 20 $\mu$ M Arg vs. 20 $\mu$ M Arg + Cit     | > 0,9999       |
| 20 $\mu$ M Arg vs. 5 $\mu$ M Arg + Cit      | 0,9987         |
| 20 $\mu$ M Arg vs. 0 $\mu$ M Arg + Cit      | 0,0032         |
| 5 $\mu$ M Arg vs. 0 $\mu$ M Arg             | 0,4565         |
| 5 $\mu$ M Arg vs. 1000 $\mu$ M Arg + Cit    | < 0,0001       |
| 5 $\mu$ M Arg vs. 100 $\mu$ M Arg + Cit     | < 0,0001       |
| 5 $\mu$ M Arg vs. 20 $\mu$ M Arg + Cit      | 0,0750         |
| 5 $\mu$ M Arg vs. 5 $\mu$ M Arg + Cit       | 0,7580         |
| 5 $\mu$ M Arg vs. 0 $\mu$ M Arg + Cit       | 0,9393         |
| 0 $\mu$ M Arg vs. 1000 $\mu$ M Arg + Cit    | < 0,0001       |
| 0 $\mu$ M Arg vs. 100 $\mu$ M Arg + Cit     | < 0,0001       |
| 0 $\mu$ M Arg vs. 20 $\mu$ M Arg + Cit      | < 0,0001       |
| 0 $\mu$ M Arg vs. 5 $\mu$ M Arg + Cit       | 0,0058         |
| 0 $\mu$ M Arg vs. 0 $\mu$ M Arg + Cit       | 0,9976         |

|                                                  |          |
|--------------------------------------------------|----------|
| 1000 $\mu$ M Arg + Cit vs. 100 $\mu$ M Arg + Cit | 0,7267   |
| 1000 $\mu$ M Arg + Cit vs. 20 $\mu$ M Arg + Cit  | 0,0293   |
| 1000 $\mu$ M Arg + Cit vs. 5 $\mu$ M Arg + Cit   | 0,0019   |
| 1000 $\mu$ M Arg + Cit vs. 0 $\mu$ M Arg + Cit   | < 0,0001 |
| 100 $\mu$ M Arg + Cit vs. 20 $\mu$ M Arg + Cit   | 0,5137   |
| 100 $\mu$ M Arg + Cit vs. 5 $\mu$ M Arg + Cit    | 0,0538   |
| 100 $\mu$ M Arg + Cit vs. 0 $\mu$ M Arg + Cit    | < 0,0001 |
| 20 $\mu$ M Arg + Cit vs. 5 $\mu$ M Arg + Cit     | 0,9784   |
| 20 $\mu$ M Arg + Cit vs. 0 $\mu$ M Arg + Cit     | 0,0007   |
| 5 $\mu$ M Arg + Cit vs. 0 $\mu$ M Arg + Cit      | 0,0756   |

**F**

| <b>experimental groups compared</b> | <b>p-value</b> |
|-------------------------------------|----------------|
| 1 mM Arg vs. 0 mM Arg               | < 0,0001       |
| 1 mM Arg vs. 0 mM Arg + 1 mM ASA    | 0,4226         |
| 0 mM Arg vs. 0 mM Arg + 1 mM ASA    | < 0,0001       |

**G**

| <b>experimental groups compared</b> | <b>p-value</b> |
|-------------------------------------|----------------|
| 1 mM Arg vs. 0 mM Arg               | < 0,0001       |
| 1 mM Arg vs. 0 mM Arg + 1 mM ASA    | 0,4641         |
| 0 mM Arg vs. 0 mM Arg + 1 mM ASA    | < 0,0001       |

**Figure 2****A**

| <b>experimental groups compared</b>              | <b>p-value</b> |
|--------------------------------------------------|----------------|
| 1000 $\mu$ M Arg vs. 100 $\mu$ M Arg             | < 0,0001       |
| 1000 $\mu$ M Arg vs. 20 $\mu$ M Arg              | < 0,0001       |
| 1000 $\mu$ M Arg vs. 5 $\mu$ M Arg               | < 0,0001       |
| 1000 $\mu$ M Arg vs. 0 $\mu$ M Arg               | < 0,0001       |
| 1000 $\mu$ M Arg vs. 1000 $\mu$ M Arg + Cit      | 0,9990         |
| 1000 $\mu$ M Arg vs. 100 $\mu$ M Arg + Cit       | > 0,9999       |
| 1000 $\mu$ M Arg vs. 20 $\mu$ M Arg + Cit        | < 0,0001       |
| 1000 $\mu$ M Arg vs. 5 $\mu$ M Arg + Cit         | < 0,0001       |
| 1000 $\mu$ M Arg vs. 0 $\mu$ M Arg + Cit         | < 0,0001       |
| 100 $\mu$ M Arg vs. 20 $\mu$ M Arg               | < 0,0001       |
| 100 $\mu$ M Arg vs. 5 $\mu$ M Arg                | < 0,0001       |
| 100 $\mu$ M Arg vs. 0 $\mu$ M Arg                | < 0,0001       |
| 100 $\mu$ M Arg vs. 1000 $\mu$ M Arg + Cit       | < 0,0001       |
| 100 $\mu$ M Arg vs. 100 $\mu$ M Arg + Cit        | < 0,0001       |
| 100 $\mu$ M Arg vs. 20 $\mu$ M Arg + Cit         | 0,8939         |
| 100 $\mu$ M Arg vs. 5 $\mu$ M Arg + Cit          | < 0,0001       |
| 100 $\mu$ M Arg vs. 0 $\mu$ M Arg + Cit          | < 0,0001       |
| 20 $\mu$ M Arg vs. 5 $\mu$ M Arg                 | 0,9981         |
| 20 $\mu$ M Arg vs. 0 $\mu$ M Arg                 | 0,9977         |
| 20 $\mu$ M Arg vs. 1000 $\mu$ M Arg + Cit        | < 0,0001       |
| 20 $\mu$ M Arg vs. 100 $\mu$ M Arg + Cit         | < 0,0001       |
| 20 $\mu$ M Arg vs. 20 $\mu$ M Arg + Cit          | 0,0012         |
| 20 $\mu$ M Arg vs. 5 $\mu$ M Arg + Cit           | > 0,9999       |
| 20 $\mu$ M Arg vs. 0 $\mu$ M Arg + Cit           | 0,9983         |
| 5 $\mu$ M Arg vs. 0 $\mu$ M Arg                  | > 0,9999       |
| 5 $\mu$ M Arg vs. 1000 $\mu$ M Arg + Cit         | < 0,0001       |
| 5 $\mu$ M Arg vs. 100 $\mu$ M Arg + Cit          | < 0,0001       |
| 5 $\mu$ M Arg vs. 20 $\mu$ M Arg + Cit           | < 0,0001       |
| 5 $\mu$ M Arg vs. 5 $\mu$ M Arg + Cit            | > 0,9999       |
| 5 $\mu$ M Arg vs. 0 $\mu$ M Arg + Cit            | > 0,9999       |
| 0 $\mu$ M Arg vs. 1000 $\mu$ M Arg + Cit         | < 0,0001       |
| 0 $\mu$ M Arg vs. 100 $\mu$ M Arg + Cit          | < 0,0001       |
| 0 $\mu$ M Arg vs. 20 $\mu$ M Arg + Cit           | < 0,0001       |
| 0 $\mu$ M Arg vs. 5 $\mu$ M Arg + Cit            | 0,9999         |
| 0 $\mu$ M Arg vs. 0 $\mu$ M Arg + Cit            | > 0,9999       |
| 1000 $\mu$ M Arg + Cit vs. 100 $\mu$ M Arg + Cit | 0,9983         |
| 1000 $\mu$ M Arg + Cit vs. 20 $\mu$ M Arg + Cit  | < 0,0001       |
| 1000 $\mu$ M Arg + Cit vs. 5 $\mu$ M Arg + Cit   | < 0,0001       |
| 1000 $\mu$ M Arg + Cit vs. 0 $\mu$ M Arg + Cit   | < 0,0001       |
| 100 $\mu$ M Arg + Cit vs. 20 $\mu$ M Arg + Cit   | < 0,0001       |
| 100 $\mu$ M Arg + Cit vs. 5 $\mu$ M Arg + Cit    | < 0,0001       |
| 100 $\mu$ M Arg + Cit vs. 0 $\mu$ M Arg + Cit    | < 0,0001       |
| 20 $\mu$ M Arg + Cit vs. 5 $\mu$ M Arg + Cit     | 0,0004         |
| 20 $\mu$ M Arg + Cit vs. 0 $\mu$ M Arg + Cit     | < 0,0001       |

|                                             |          |
|---------------------------------------------|----------|
| 5 $\mu$ M Arg + Cit vs. 0 $\mu$ M Arg + Cit | > 0,9999 |
|---------------------------------------------|----------|

**B**

| <b>experimental groups compared</b>              | <b>p-value</b> |
|--------------------------------------------------|----------------|
| 1000 $\mu$ M Arg vs. 100 $\mu$ M Arg             | > 0,9999       |
| 1000 $\mu$ M Arg vs. 20 $\mu$ M Arg              | < 0,0001       |
| 1000 $\mu$ M Arg vs. 5 $\mu$ M Arg               | < 0,0001       |
| 1000 $\mu$ M Arg vs. 0 $\mu$ M Arg               | < 0,0001       |
| 1000 $\mu$ M Arg vs. 1000 $\mu$ M Arg + Cit      | 0,9996         |
| 1000 $\mu$ M Arg vs. 100 $\mu$ M Arg + Cit       | 0,0464         |
| 1000 $\mu$ M Arg vs. 20 $\mu$ M Arg + Cit        | < 0,0001       |
| 1000 $\mu$ M Arg vs. 5 $\mu$ M Arg + Cit         | < 0,0001       |
| 1000 $\mu$ M Arg vs. 0 $\mu$ M Arg + Cit         | < 0,0001       |
| 100 $\mu$ M Arg vs. 20 $\mu$ M Arg               | < 0,0001       |
| 100 $\mu$ M Arg vs. 5 $\mu$ M Arg                | < 0,0001       |
| 100 $\mu$ M Arg vs. 0 $\mu$ M Arg                | < 0,0001       |
| 100 $\mu$ M Arg vs. 1000 $\mu$ M Arg + Cit       | 0,9328         |
| 100 $\mu$ M Arg vs. 100 $\mu$ M Arg + Cit        | 0,0020         |
| 100 $\mu$ M Arg vs. 20 $\mu$ M Arg + Cit         | < 0,0001       |
| 100 $\mu$ M Arg vs. 5 $\mu$ M Arg + Cit          | < 0,0001       |
| 100 $\mu$ M Arg vs. 0 $\mu$ M Arg + Cit          | < 0,0001       |
| 20 $\mu$ M Arg vs. 5 $\mu$ M Arg                 | 0,4075         |
| 20 $\mu$ M Arg vs. 0 $\mu$ M Arg                 | 0,2630         |
| 20 $\mu$ M Arg vs. 1000 $\mu$ M Arg + Cit        | < 0,0001       |
| 20 $\mu$ M Arg vs. 100 $\mu$ M Arg + Cit         | < 0,0001       |
| 20 $\mu$ M Arg vs. 20 $\mu$ M Arg + Cit          | < 0,0001       |
| 20 $\mu$ M Arg vs. 5 $\mu$ M Arg + Cit           | > 0,9999       |
| 20 $\mu$ M Arg vs. 0 $\mu$ M Arg + Cit           | 0,3264         |
| 5 $\mu$ M Arg vs. 0 $\mu$ M Arg                  | > 0,9999       |
| 5 $\mu$ M Arg vs. 1000 $\mu$ M Arg + Cit         | < 0,0001       |
| 5 $\mu$ M Arg vs. 100 $\mu$ M Arg + Cit          | < 0,0001       |
| 5 $\mu$ M Arg vs. 20 $\mu$ M Arg + Cit           | < 0,0001       |
| 5 $\mu$ M Arg vs. 5 $\mu$ M Arg + Cit            | 0,5764         |
| 5 $\mu$ M Arg vs. 0 $\mu$ M Arg + Cit            | > 0,9999       |
| 0 $\mu$ M Arg vs. 1000 $\mu$ M Arg + Cit         | < 0,0001       |
| 0 $\mu$ M Arg vs. 100 $\mu$ M Arg + Cit          | < 0,0001       |
| 0 $\mu$ M Arg vs. 20 $\mu$ M Arg + Cit           | < 0,0001       |
| 0 $\mu$ M Arg vs. 5 $\mu$ M Arg + Cit            | 0,4075         |
| 0 $\mu$ M Arg vs. 0 $\mu$ M Arg + Cit            | > 0,9999       |
| 1000 $\mu$ M Arg + Cit vs. 100 $\mu$ M Arg + Cit | 0,1229         |
| 1000 $\mu$ M Arg + Cit vs. 20 $\mu$ M Arg + Cit  | < 0,0001       |
| 1000 $\mu$ M Arg + Cit vs. 5 $\mu$ M Arg + Cit   | < 0,0001       |
| 1000 $\mu$ M Arg + Cit vs. 0 $\mu$ M Arg + Cit   | < 0,0001       |
| 100 $\mu$ M Arg + Cit vs. 20 $\mu$ M Arg + Cit   | < 0,0001       |
| 100 $\mu$ M Arg + Cit vs. 5 $\mu$ M Arg + Cit    | < 0,0001       |
| 100 $\mu$ M Arg + Cit vs. 0 $\mu$ M Arg + Cit    | < 0,0001       |

|                                              |          |
|----------------------------------------------|----------|
| 20 $\mu$ M Arg + Cit vs. 5 $\mu$ M Arg + Cit | < 0,0001 |
| 20 $\mu$ M Arg + Cit vs. 0 $\mu$ M Arg + Cit | < 0,0001 |
| 5 $\mu$ M Arg + Cit vs. 0 $\mu$ M Arg + Cit  | 0,4850   |

C

| <b>experimental groups compared</b>              | <b>p-value</b> |
|--------------------------------------------------|----------------|
| 1000 $\mu$ M Arg vs. 100 $\mu$ M Arg             | 0,6202         |
| 1000 $\mu$ M Arg vs. 20 $\mu$ M Arg              | < 0,0001       |
| 1000 $\mu$ M Arg vs. 5 $\mu$ M Arg               | < 0,0001       |
| 1000 $\mu$ M Arg vs. 0 $\mu$ M Arg               | < 0,0001       |
| 1000 $\mu$ M Arg vs. 1000 $\mu$ M Arg + Cit      | 0,0056         |
| 1000 $\mu$ M Arg vs. 100 $\mu$ M Arg + Cit       | < 0,0001       |
| 1000 $\mu$ M Arg vs. 20 $\mu$ M Arg + Cit        | < 0,0001       |
| 1000 $\mu$ M Arg vs. 5 $\mu$ M Arg + Cit         | < 0,0001       |
| 1000 $\mu$ M Arg vs. 0 $\mu$ M Arg + Cit         | < 0,0001       |
| 100 $\mu$ M Arg vs. 20 $\mu$ M Arg               | < 0,0001       |
| 100 $\mu$ M Arg vs. 5 $\mu$ M Arg                | < 0,0001       |
| 100 $\mu$ M Arg vs. 0 $\mu$ M Arg                | < 0,0001       |
| 100 $\mu$ M Arg vs. 1000 $\mu$ M Arg + Cit       | 0,4940         |
| 100 $\mu$ M Arg vs. 100 $\mu$ M Arg + Cit        | 0,0002         |
| 100 $\mu$ M Arg vs. 20 $\mu$ M Arg + Cit         | < 0,0001       |
| 100 $\mu$ M Arg vs. 5 $\mu$ M Arg + Cit          | < 0,0001       |
| 100 $\mu$ M Arg vs. 0 $\mu$ M Arg + Cit          | < 0,0001       |
| 20 $\mu$ M Arg vs. 5 $\mu$ M Arg                 | 0,7202         |
| 20 $\mu$ M Arg vs. 0 $\mu$ M Arg                 | 0,0440         |
| 20 $\mu$ M Arg vs. 1000 $\mu$ M Arg + Cit        | < 0,0001       |
| 20 $\mu$ M Arg vs. 100 $\mu$ M Arg + Cit         | 0,1075         |
| 20 $\mu$ M Arg vs. 20 $\mu$ M Arg + Cit          | > 0,9999       |
| 20 $\mu$ M Arg vs. 5 $\mu$ M Arg + Cit           | 0,7138         |
| 20 $\mu$ M Arg vs. 0 $\mu$ M Arg + Cit           | 0,0384         |
| 5 $\mu$ M Arg vs. 0 $\mu$ M Arg                  | 0,9158         |
| 5 $\mu$ M Arg vs. 1000 $\mu$ M Arg + Cit         | < 0,0001       |
| 5 $\mu$ M Arg vs. 100 $\mu$ M Arg + Cit          | 0,0002         |
| 5 $\mu$ M Arg vs. 20 $\mu$ M Arg + Cit           | 0,5405         |
| 5 $\mu$ M Arg vs. 5 $\mu$ M Arg + Cit            | > 0,9999       |
| 5 $\mu$ M Arg vs. 0 $\mu$ M Arg + Cit            | 0,8994         |
| 0 $\mu$ M Arg vs. 1000 $\mu$ M Arg + Cit         | < 0,0001       |
| 0 $\mu$ M Arg vs. 100 $\mu$ M Arg + Cit          | < 0,0001       |
| 0 $\mu$ M Arg vs. 20 $\mu$ M Arg + Cit           | 0,0197         |
| 0 $\mu$ M Arg vs. 5 $\mu$ M Arg + Cit            | 0,9191         |
| 0 $\mu$ M Arg vs. 0 $\mu$ M Arg + Cit            | > 0,9999       |
| 1000 $\mu$ M Arg + Cit vs. 100 $\mu$ M Arg + Cit | 0,3861         |
| 1000 $\mu$ M Arg + Cit vs. 20 $\mu$ M Arg + Cit  | < 0,0001       |
| 1000 $\mu$ M Arg + Cit vs. 5 $\mu$ M Arg + Cit   | < 0,0001       |
| 1000 $\mu$ M Arg + Cit vs. 0 $\mu$ M Arg + Cit   | < 0,0001       |
| 100 $\mu$ M Arg + Cit vs. 20 $\mu$ M Arg + Cit   | 0,1955         |

|                                               |          |
|-----------------------------------------------|----------|
| 100 $\mu$ M Arg + Cit vs. 5 $\mu$ M Arg + Cit | 0,0002   |
| 100 $\mu$ M Arg + Cit vs. 0 $\mu$ M Arg + Cit | < 0,0001 |
| 20 $\mu$ M Arg + Cit vs. 5 $\mu$ M Arg + Cit  | 0,5336   |
| 20 $\mu$ M Arg + Cit vs. 0 $\mu$ M Arg + Cit  | 0,0170   |
| 5 $\mu$ M Arg + Cit vs. 0 $\mu$ M Arg + Cit   | 0,9030   |

**D**

| <b>experimental groups compared</b>              | <b>p-value</b> |
|--------------------------------------------------|----------------|
| 1000 $\mu$ M Arg vs. 100 $\mu$ M Arg             | < 0,0001       |
| 1000 $\mu$ M Arg vs. 20 $\mu$ M Arg              | < 0,0001       |
| 1000 $\mu$ M Arg vs. 5 $\mu$ M Arg               | < 0,0001       |
| 1000 $\mu$ M Arg vs. 0 $\mu$ M Arg               | < 0,0001       |
| 1000 $\mu$ M Arg vs. 1000 $\mu$ M Arg + Cit      | < 0,0001       |
| 1000 $\mu$ M Arg vs. 100 $\mu$ M Arg + Cit       | < 0,0001       |
| 1000 $\mu$ M Arg vs. 20 $\mu$ M Arg + Cit        | < 0,0001       |
| 1000 $\mu$ M Arg vs. 5 $\mu$ M Arg + Cit         | < 0,0001       |
| 1000 $\mu$ M Arg vs. 0 $\mu$ M Arg + Cit         | < 0,0001       |
| 100 $\mu$ M Arg vs. 20 $\mu$ M Arg               | < 0,0001       |
| 100 $\mu$ M Arg vs. 5 $\mu$ M Arg                | < 0,0001       |
| 100 $\mu$ M Arg vs. 0 $\mu$ M Arg                | < 0,0001       |
| 100 $\mu$ M Arg vs. 1000 $\mu$ M Arg + Cit       | 0,5805         |
| 100 $\mu$ M Arg vs. 100 $\mu$ M Arg + Cit        | 0,0593         |
| 100 $\mu$ M Arg vs. 20 $\mu$ M Arg + Cit         | < 0,0001       |
| 100 $\mu$ M Arg vs. 5 $\mu$ M Arg + Cit          | < 0,0001       |
| 100 $\mu$ M Arg vs. 0 $\mu$ M Arg + Cit          | < 0,0001       |
| 20 $\mu$ M Arg vs. 5 $\mu$ M Arg                 | 0,9843         |
| 20 $\mu$ M Arg vs. 0 $\mu$ M Arg                 | 0,5765         |
| 20 $\mu$ M Arg vs. 1000 $\mu$ M Arg + Cit        | < 0,0001       |
| 20 $\mu$ M Arg vs. 100 $\mu$ M Arg + Cit         | 0,0074         |
| 20 $\mu$ M Arg vs. 20 $\mu$ M Arg + Cit          | 0,9996         |
| 20 $\mu$ M Arg vs. 5 $\mu$ M Arg + Cit           | 0,9831         |
| 20 $\mu$ M Arg vs. 0 $\mu$ M Arg + Cit           | 0,6566         |
| 5 $\mu$ M Arg vs. 0 $\mu$ M Arg                  | 0,9951         |
| 5 $\mu$ M Arg vs. 1000 $\mu$ M Arg + Cit         | < 0,0001       |
| 5 $\mu$ M Arg vs. 100 $\mu$ M Arg + Cit          | < 0,0001       |
| 5 $\mu$ M Arg vs. 20 $\mu$ M Arg + Cit           | > 0,9999       |
| 5 $\mu$ M Arg vs. 5 $\mu$ M Arg + Cit            | > 0,9999       |
| 5 $\mu$ M Arg vs. 0 $\mu$ M Arg + Cit            | 0,9982         |
| 0 $\mu$ M Arg vs. 1000 $\mu$ M Arg + Cit         | < 0,0001       |
| 0 $\mu$ M Arg vs. 100 $\mu$ M Arg + Cit          | < 0,0001       |
| 0 $\mu$ M Arg vs. 20 $\mu$ M Arg + Cit           | 0,9394         |
| 0 $\mu$ M Arg vs. 5 $\mu$ M Arg + Cit            | 0,9964         |
| 0 $\mu$ M Arg vs. 0 $\mu$ M Arg + Cit            | > 0,9999       |
| 1000 $\mu$ M Arg + Cit vs. 100 $\mu$ M Arg + Cit | < 0,0001       |
| 1000 $\mu$ M Arg + Cit vs. 20 $\mu$ M Arg + Cit  | < 0,0001       |
| 1000 $\mu$ M Arg + Cit vs. 5 $\mu$ M Arg + Cit   | < 0,0001       |

|                                                |          |
|------------------------------------------------|----------|
| 1000 $\mu$ M Arg + Cit vs. 0 $\mu$ M Arg + Cit | < 0,0001 |
| 100 $\mu$ M Arg + Cit vs. 20 $\mu$ M Arg + Cit | 0,0005   |
| 100 $\mu$ M Arg + Cit vs. 5 $\mu$ M Arg + Cit  | 0,0001   |
| 100 $\mu$ M Arg + Cit vs. 0 $\mu$ M Arg + Cit  | < 0,0001 |
| 20 $\mu$ M Arg + Cit vs. 5 $\mu$ M Arg + Cit   | > 0,9999 |
| 20 $\mu$ M Arg + Cit vs. 0 $\mu$ M Arg + Cit   | 0,9652   |
| 5 $\mu$ M Arg + Cit vs. 0 $\mu$ M Arg + Cit    | 0,9987   |

**E**

| <b>experimental groups compared</b> | <b>p-value</b> |
|-------------------------------------|----------------|
| 1 mM Arg vs. 0 mM Arg               | < 0,0001       |
| 1 mM Arg vs. 1 mM ASA               | 0,0022         |
| 0 mM Arg vs. 1 mM ASA               | < 0,0001       |

**F**

| <b>experimental groups compared</b> | <b>p-value</b> |
|-------------------------------------|----------------|
| 1 mM Arg vs. 0 mM Arg               | < 0,0001       |
| 1 mM Arg vs. 1 mM ASA               | 0,0014         |
| 0 mM Arg vs. 1 mM ASA               | < 0,0001       |

**G**

| <b>experimental groups compared</b> | <b>p-value</b> |
|-------------------------------------|----------------|
| 1 mM Arg vs. 0 mM Arg               | < 0,0001       |
| 1 mM Arg vs. 1 mM ASA               | < 0,0001       |
| 0 mM Arg vs. 1 mM ASA               | < 0,0001       |

**H**

| <b>experimental groups compared</b> | <b>p-value</b> |
|-------------------------------------|----------------|
| 1 mM Arg vs. 0 mM Arg               | < 0,0001       |
| 1 mM Arg vs. 1 mM ASA               | < 0,0001       |
| 0 mM Arg vs. 1 mM ASA               | 0,0026         |



**Figure 3**

**B**

| <b>experimental groups compared</b> | <b>p-value</b> |
|-------------------------------------|----------------|
| 1000 $\mu$ M Arg vs. 20 $\mu$ M Arg | 0,0504         |
| 1000 $\mu$ M Arg vs. 0 $\mu$ M Arg  | < 0,0001       |
| 20 $\mu$ M Arg vs. 0 $\mu$ M Arg    | < 0,0001       |

**Figure 4**

**A**

| <b>experimental groups compared</b> | <b>p-value</b> |
|-------------------------------------|----------------|
| variation of time                   | 0,0010         |
| 0 $\mu$ M Arg vs. 20 $\mu$ M Arg    | 0,4644         |

**B**

| <b>experimental groups compared</b> | <b>p-value</b> |
|-------------------------------------|----------------|
| variation of time                   | 0,0879         |
| 0 $\mu$ M Arg vs. 20 $\mu$ M Arg    | 0,0088         |

**C**

| <b>experimental groups compared</b> | <b>p-value</b> |
|-------------------------------------|----------------|
| variation of time                   | 0,6561         |
| 0 $\mu$ M Arg vs. 20 $\mu$ M Arg    | 0,0096         |

**Figure 5**

**A**

| <b>experimental groups compared</b> | <b>p-value</b> |
|-------------------------------------|----------------|
| sodium (+) vs. sodium (-)           | 0,5243         |

**B**

| <b>experimental groups compared</b> | <b>p-value</b> |
|-------------------------------------|----------------|
| control vs. Leu                     | < 0,0001       |
| control vs. BCH                     | < 0,0001       |
| control vs. His                     | < 0,0001       |
| control vs. Arg                     | 0,1101         |
| control vs. Pro                     | 0,1834         |
| control vs. Gly                     | 0,0105         |

**Figure 6**

**A**

| <b>experimental groups compared</b> | <b>p-value</b> |
|-------------------------------------|----------------|
| control vs. Leu                     | < 0,0001       |
| control vs. Cit                     | < 0,0001       |
| Leu vs. Cit                         | < 0,0001       |

**B**

| <b>experimental groups compared</b> | <b>p-value</b> |
|-------------------------------------|----------------|
| control vs. LAT1/4F2hc              | < 0,0001       |

**Figure 7**

**A**

| <b>experimental groups compared</b>            | <b>p-value</b> |
|------------------------------------------------|----------------|
| 0 h:1000 $\mu$ M Arg vs. 6 h:1000 $\mu$ M Arg  | < 0,0001       |
| 0 h:1000 $\mu$ M Arg vs. 6 h:20 $\mu$ M Arg    | 0,0001         |
| 0 h:1000 $\mu$ M Arg vs. 6 h:0 $\mu$ M Arg     | < 0,0001       |
| 0 h:1000 $\mu$ M Arg vs. 24 h:1000 $\mu$ M Arg | 0,0115         |
| 0 h:1000 $\mu$ M Arg vs. 24 h:20 $\mu$ M Arg   | 0,0004         |
| 0 h:1000 $\mu$ M Arg vs. 24 h:0 $\mu$ M Arg    | 0,0194         |
| 0 h:1000 $\mu$ M Arg vs. 48 h:20 $\mu$ M Arg   | 0,0001         |
| 0 h:1000 $\mu$ M Arg vs. 48 h:0 $\mu$ M Arg    | 0,0213         |
| 6 h:1000 $\mu$ M Arg vs. 6 h:20 $\mu$ M Arg    | > 0,9999       |
| 6 h:1000 $\mu$ M Arg vs. 6 h:0 $\mu$ M Arg     | 0,8853         |
| 6 h:1000 $\mu$ M Arg vs. 24 h:1000 $\mu$ M Arg | 0,9213         |
| 6 h:1000 $\mu$ M Arg vs. 24 h:20 $\mu$ M Arg   | > 0,9999       |
| 6 h:1000 $\mu$ M Arg vs. 24 h:0 $\mu$ M Arg    | 0,8481         |
| 6 h:1000 $\mu$ M Arg vs. 48 h:20 $\mu$ M Arg   | > 0,9999       |
| 6 h:1000 $\mu$ M Arg vs. 48 h:0 $\mu$ M Arg    | 0,8311         |
| 6 h:20 $\mu$ M Arg vs. 6 h:0 $\mu$ M Arg       | 0,9596         |
| 6 h:20 $\mu$ M Arg vs. 24 h:1000 $\mu$ M Arg   | 0,8984         |
| 6 h:20 $\mu$ M Arg vs. 24 h:20 $\mu$ M Arg     | > 0,9999       |
| 6 h:20 $\mu$ M Arg vs. 24 h:0 $\mu$ M Arg      | 0,8206         |
| 6 h:20 $\mu$ M Arg vs. 48 h:20 $\mu$ M Arg     | > 0,9999       |
| 6 h:20 $\mu$ M Arg vs. 48 h:0 $\mu$ M Arg      | 0,8032         |
| 6 h:0 $\mu$ M Arg vs. 24 h:1000 $\mu$ M Arg    | 0,0942         |
| 6 h:0 $\mu$ M Arg vs. 24 h:20 $\mu$ M Arg      | 0,6057         |
| 6 h:0 $\mu$ M Arg vs. 24 h:0 $\mu$ M Arg       | 0,0603         |
| 6 h:0 $\mu$ M Arg vs. 48 h:20 $\mu$ M Arg      | 0,8204         |
| 6 h:0 $\mu$ M Arg vs. 48 h:0 $\mu$ M Arg       | 0,0553         |
| 24 h:1000 $\mu$ M Arg vs. 24 h:20 $\mu$ M Arg  | 0,9954         |
| 24 h:1000 $\mu$ M Arg vs. 24 h:0 $\mu$ M Arg   | > 0,9999       |
| 24 h:1000 $\mu$ M Arg vs. 48 h:20 $\mu$ M Arg  | 0,9580         |
| 24 h:1000 $\mu$ M Arg vs. 48 h:0 $\mu$ M Arg   | > 0,9999       |
| 24 h:20 $\mu$ M Arg vs. 24 h:0 $\mu$ M Arg     | 0,9832         |
| 24 h:20 $\mu$ M Arg vs. 48 h:20 $\mu$ M Arg    | > 0,9999       |
| 24 h:20 $\mu$ M Arg vs. 48 h:0 $\mu$ M Arg     | 0,9792         |
| 24 h:0 $\mu$ M Arg vs. 48 h:20 $\mu$ M Arg     | 0,9066         |
| 24 h:0 $\mu$ M Arg vs. 48 h:0 $\mu$ M Arg      | > 0,9999       |
| 48 h:20 $\mu$ M Arg vs. 48 h:0 $\mu$ M Arg     | 0,8937         |

**B**

| <b>experimental groups compared</b>            | <b>p-value</b> |
|------------------------------------------------|----------------|
| 0 h:1000 $\mu$ M Arg vs. 6 h:1000 $\mu$ M Arg  | 0,4567         |
| 0 h:1000 $\mu$ M Arg vs. 6 h:20 $\mu$ M Arg    | 0,5617         |
| 0 h:1000 $\mu$ M Arg vs. 6 h:0 $\mu$ M Arg     | 0,0853         |
| 0 h:1000 $\mu$ M Arg vs. 24 h:1000 $\mu$ M Arg | > 0,9999       |

|                                                |          |
|------------------------------------------------|----------|
| 0 h:1000 $\mu$ M Arg vs. 24 h:20 $\mu$ M Arg   | 0,8946   |
| 0 h:1000 $\mu$ M Arg vs. 24 h:0 $\mu$ M Arg    | 0,0093   |
| 0 h:1000 $\mu$ M Arg vs. 48 h:20 $\mu$ M Arg   | 0,1151   |
| 0 h:1000 $\mu$ M Arg vs. 48 h:0 $\mu$ M Arg    | 0,0155   |
| 6 h:1000 $\mu$ M Arg vs. 6 h:20 $\mu$ M Arg    | > 0,9999 |
| 6 h:1000 $\mu$ M Arg vs. 6 h:0 $\mu$ M Arg     | 0,9986   |
| 6 h:1000 $\mu$ M Arg vs. 24 h:1000 $\mu$ M Arg | 0,8174   |
| 6 h:1000 $\mu$ M Arg vs. 24 h:20 $\mu$ M Arg   | 0,9998   |
| 6 h:1000 $\mu$ M Arg vs. 24 h:0 $\mu$ M Arg    | 0,8106   |
| 6 h:1000 $\mu$ M Arg vs. 48 h:20 $\mu$ M Arg   | 0,9997   |
| 6 h:1000 $\mu$ M Arg vs. 48 h:0 $\mu$ M Arg    | 0,8192   |
| 6 h:20 $\mu$ M Arg vs. 6 h:0 $\mu$ M Arg       | 0,9942   |
| 6 h:20 $\mu$ M Arg vs. 24 h:1000 $\mu$ M Arg   | 0,8909   |
| 6 h:20 $\mu$ M Arg vs. 24 h:20 $\mu$ M Arg     | > 0,9999 |
| 6 h:20 $\mu$ M Arg vs. 24 h:0 mM Arg           | 0,7177   |
| 6 h:20 $\mu$ M Arg vs. 48 h:20 $\mu$ M Arg     | 0,9982   |
| 6 h:20 $\mu$ M Arg vs. 48 h:0 $\mu$ M Arg      | 0,7351   |
| 6 h:0 $\mu$ M Arg vs. 24 h:1000 $\mu$ M Arg    | 0,2739   |
| 6 h:0 $\mu$ M Arg vs. 24 h:20 $\mu$ M Arg      | 0,8743   |
| 6 h:0 $\mu$ M Arg vs. 24 h:0 $\mu$ M Arg       | 0,9989   |
| 6 h:0 $\mu$ M Arg vs. 48 h:20 $\mu$ M Arg      | > 0,9999 |
| 6 h:0 $\mu$ M Arg vs. 48 h:0 mM Arg            | 0,9981   |
| 24 h:1000 $\mu$ M Arg vs. 24 h:20 $\mu$ M Arg  | 0,9958   |
| 24 h:1000 $\mu$ M Arg vs. 24 h:0 $\mu$ M Arg   | 0,0415   |
| 24 h:1000 $\mu$ M Arg vs. 48 h:20 $\mu$ M Arg  | 0,3441   |
| 24 h:1000 $\mu$ M Arg vs. 48 h:0 $\mu$ M Arg   | 0,0593   |
| 24 h:20 $\mu$ M Arg vs. 24 h:0 $\mu$ M Arg     | 0,3469   |
| 24 h:20 $\mu$ M Arg vs. 48 h:20 $\mu$ M Arg    | 0,9241   |
| 24 h:20 $\mu$ M Arg vs. 48 h:0 mM Arg          | 0,3881   |
| 24 h:0 $\mu$ M Arg vs. 48 h:20 $\mu$ M Arg     | 0,9960   |
| 24 h:0 $\mu$ M Arg vs. 48 h:0 $\mu$ M Arg      | > 0,9999 |
| 48 h:20 $\mu$ M Arg vs. 48 h:0 $\mu$ M Arg     | 0,9945   |

D

| <b>experimental groups compared</b>            | <b>p-value</b> |
|------------------------------------------------|----------------|
| 0 h:1000 $\mu$ M Arg vs. 6 h:1000 $\mu$ M Arg  | 0,9994         |
| 0 h:1000 $\mu$ M Arg vs. 6 h:20 $\mu$ M Arg    | 0,9998         |
| 0 h:1000 $\mu$ M Arg vs. 6 h:0 $\mu$ M Arg     | > 0,9999       |
| 0 h:1000 $\mu$ M Arg vs. 24 h:1000 $\mu$ M Arg | < 0,0001       |
| 0 h:1000 $\mu$ M Arg vs. 24 h:20 $\mu$ M Arg   | < 0,0001       |
| 0 h:1000 $\mu$ M Arg vs. 24 h:0 $\mu$ M Arg    | 0,3491         |
| 0 h:1000 $\mu$ M Arg vs. 48 h:20 $\mu$ M Arg   | < 0,0001       |
| 0 h:1000 $\mu$ M Arg vs. 48 h:0 $\mu$ M Arg    | 0,0198         |
| 6 h:1000 $\mu$ M Arg vs. 6 h:20 $\mu$ M Arg    | > 0,9999       |
| 6 h:1000 $\mu$ M Arg vs. 6 h:0 $\mu$ M Arg     | > 0,9999       |
| 6 h:1000 $\mu$ M Arg vs. 24 h:1000 $\mu$ M Arg | 0,0002         |

|                                               |          |
|-----------------------------------------------|----------|
| 6 h:1000 $\mu$ M Arg vs. 24 h:20 $\mu$ M Arg  | < 0,0001 |
| 6 h:1000 $\mu$ M Arg vs. 24 h:0 $\mu$ M Arg   | 0,8222   |
| 6 h:1000 $\mu$ M Arg vs. 48 h:20 $\mu$ M Arg  | < 0,0001 |
| 6 h:1000 $\mu$ M Arg vs. 48 h:0 $\mu$ M Arg   | 0,1114   |
| 6 h:20 $\mu$ M Arg vs. 6 h:0 $\mu$ M Arg      | > 0,9999 |
| 6 h:20 $\mu$ M Arg vs. 24 h:1000 $\mu$ M Arg  | 0,0002   |
| 6 h:20 $\mu$ M Arg vs. 24 h:20 $\mu$ M Arg    | < 0,0001 |
| 6 h:20 $\mu$ M Arg vs. 24 h:0 $\mu$ M Arg     | 0,7672   |
| 6 h:20 $\mu$ M Arg vs. 48 h:20 $\mu$ M Arg    | < 0,0001 |
| 6 h:20 $\mu$ M Arg vs. 48 h:0 $\mu$ M Arg     | 0,0904   |
| 6 h:0 $\mu$ M Arg vs. 24 h:1000 $\mu$ M Arg   | < 0,0001 |
| 6 h:0 $\mu$ M Arg vs. 24 h:20 $\mu$ M Arg     | < 0,0001 |
| 6 h:0 $\mu$ M Arg vs. 24 h:0 $\mu$ M Arg      | 0,5630   |
| 6 h:0 $\mu$ M Arg vs. 48 h:20 $\mu$ M Arg     | < 0,0001 |
| 6 h:0 $\mu$ M Arg vs. 48 h:0 $\mu$ M Arg      | 0,0446   |
| 24 h:1000 $\mu$ M Arg vs. 24 h:20 $\mu$ M Arg | 0,9988   |
| 24 h:1000 $\mu$ M Arg vs. 24 h:0 $\mu$ M Arg  | 0,0147   |
| 24 h:1000 $\mu$ M Arg vs. 48 h:20 $\mu$ M Arg | 0,0034   |
| 24 h:1000 $\mu$ M Arg vs. 48 h:0 $\mu$ M Arg  | 0,2855   |
| 24 h:20 $\mu$ M Arg vs. 24 h:0 $\mu$ M Arg    | 0,0018   |
| 24 h:20 $\mu$ M Arg vs. 48 h:20 $\mu$ M Arg   | 0,0263   |
| 24 h:20 $\mu$ M Arg vs. 48 h:0 $\mu$ M Arg    | 0,0537   |
| 24 h:0 $\mu$ M Arg vs. 48 h:20 $\mu$ M Arg    | < 0,0001 |
| 24 h:0 $\mu$ M Arg vs. 48 h:0 $\mu$ M Arg     | 0,9387   |
| 48 h:20 $\mu$ M Arg vs. 48 h:0 $\mu$ M Arg    | < 0,0001 |

E

| <b>experimental groups compared</b>            | <b>p-value</b> |
|------------------------------------------------|----------------|
| 0 h:1000 $\mu$ M Arg vs. 6 h:1000 $\mu$ M Arg  | 0,7912         |
| 0 h:1000 $\mu$ M Arg vs. 6 h:20 $\mu$ M Arg    | 0,7983         |
| 0 h:1000 $\mu$ M Arg vs. 6 h:0 $\mu$ M Arg     | 0,9960         |
| 0 h:1000 $\mu$ M Arg vs. 24 h:1000 $\mu$ M Arg | < 0,0001       |
| 0 h:1000 $\mu$ M Arg vs. 24 h:20 $\mu$ M Arg   | < 0,0001       |
| 0 h:1000 $\mu$ M Arg vs. 24 h:0 $\mu$ M Arg    | 0,0087         |
| 0 h:1000 $\mu$ M Arg vs. 48 h:20 $\mu$ M Arg   | < 0,0001       |
| 0 h:1000 $\mu$ M Arg vs. 48 h:0 $\mu$ M Arg    | < 0,0001       |
| 6 h:1000 $\mu$ M Arg vs. 6 h:20 $\mu$ M Arg    | > 0,9999       |
| 6 h:1000 $\mu$ M Arg vs. 6 h:0 $\mu$ M Arg     | 0,9994         |
| 6 h:1000 $\mu$ M Arg vs. 24 h:1000 $\mu$ M Arg | 0,0001         |
| 6 h:1000 $\mu$ M Arg vs. 24 h:20 $\mu$ M Arg   | < 0,0001       |
| 6 h:1000 $\mu$ M Arg vs. 24 h:0 $\mu$ M Arg    | 0,3567         |
| 6 h:1000 $\mu$ M Arg vs. 48 h:20 $\mu$ M Arg   | < 0,0001       |
| 6 h:1000 $\mu$ M Arg vs. 48 h:0 $\mu$ M Arg    | 0,0050         |
| 6 h:20 $\mu$ M Arg vs. 6 h:0 $\mu$ M Arg       | 0,9994         |
| 6 h:20 $\mu$ M Arg vs. 24 h:1000 $\mu$ M Arg   | 0,0001         |
| 6 h:20 $\mu$ M Arg vs. 24 h:20 $\mu$ M Arg     | < 0,0001       |

|                                               |          |
|-----------------------------------------------|----------|
| 6 h:20 $\mu$ M Arg vs. 24 h:0 $\mu$ M Arg     | 0,3497   |
| 6 h:20 $\mu$ M Arg vs. 48 h:20 $\mu$ M Arg    | < 0,0001 |
| 6 h:20 $\mu$ M Arg vs. 48 h:0 $\mu$ M Arg     | 0,0049   |
| 6 h:0 $\mu$ M Arg vs. 24 h:1000 $\mu$ M Arg   | < 0,0001 |
| 6 h:0 $\mu$ M Arg vs. 24 h:20 $\mu$ M Arg     | < 0,0001 |
| 6 h:0 $\mu$ M Arg vs. 24 h:0 $\mu$ M Arg      | 0,0822   |
| 6 h:0 $\mu$ M Arg vs. 48 h:20 $\mu$ M Arg     | < 0,0001 |
| 6 h:0 $\mu$ M Arg vs. 48 h:0 $\mu$ M Arg      | 0,0007   |
| 24 h:1000 $\mu$ M Arg vs. 24 h:20 $\mu$ M Arg | 0,9965   |
| 24 h:1000 $\mu$ M Arg vs. 24 h:0 $\mu$ M Arg  | 0,0499   |
| 24 h:1000 $\mu$ M Arg vs. 48 h:20 $\mu$ M Arg | 0,0001   |
| 24 h:1000 $\mu$ M Arg vs. 48 h:0 $\mu$ M Arg  | 0,9109   |
| 24 h:20 $\mu$ M Arg vs. 24 h:0 $\mu$ M Arg    | 0,0052   |
| 24 h:20 $\mu$ M Arg vs. 48 h:20 $\mu$ M Arg   | 0,0011   |
| 24 h:20 $\mu$ M Arg vs. 48 h:0 $\mu$ M Arg    | 0,3634   |
| 24 h:0 $\mu$ M Arg vs. 48 h:20 $\mu$ M Arg    | < 0,0001 |
| 24 h:0 $\mu$ M Arg vs. 48 h:0 $\mu$ M Arg     | 0,6543   |
| 48 h:20 $\mu$ M Arg vs. 48 h:0 $\mu$ M Arg    | < 0,0001 |



**Figure 8**

**B**

| <b>experimental groups compared</b> | <b>p-value</b> |
|-------------------------------------|----------------|
| Co vs. -                            | 0,0005         |
| Co vs. nt                           | 0,0003         |
| Co vs. siLAT1                       | 0,7887         |
| - vs. nt                            | 0,9951         |
| - vs. siLAT1                        | 0,0024         |
| nt vs. siLAT1                       | 0,0014         |

**C**

| <b>experimental groups compared</b> | <b>p-value</b> |
|-------------------------------------|----------------|
| Co vs. -                            | < 0,0001       |
| Co vs. nt                           | < 0,0001       |
| Co vs. siLAT1                       | 0,7093         |
| - vs. nt                            | 0,9701         |
| - vs. siLAT1                        | < 0,0001       |
| nt vs. siLAT1                       | < 0,0001       |
